# Supplementary material for: Electrooptical properties of liquid-crystalline physical gels: a new oligo(amino acid) gelator for light scattering display materials
Source: Royal Society of Chemistry journal article supplement (doi:10.1039/b201484j), 2002-01-01
Supplement: b201484j.doc [file b201484j.doc]

*Supplementary Information*

*for*

Electrooptical properties of liquid-crystalline physical gels:

a new oligo(amino acid) gelator for light scattering display materials

Norihiro Mizoshita, Yuki Suzuki, Kenji Kishimoto, Kenji Hanabusa and Takashi Kato*

The atomic force microscope (AFM) and scanning electron microscope (SEM) observations enable us to examine the morphologies of the gelator aggregates at higher magnifications. Fig. S1 shows the AFM and SEM images of the aggregates of **1**–**3** formed in the cells. Gelators **1** and **3** form network aggregates with different pore sizes (Fig. S1a and c). The fibrous aggregates of **1** are ca. 30 nm in diameter, which are finer than those of **3** with a diameter of ca. 100 nm. On the other hand, gelator **2** forms thick aggregates with a diameter of 5–20 µm (Fig. S1b) These structural differences of the aggregates agree with those observed by polarising optical microscopy (Fig. 2). Such different morphologies of these aggregates lead to the significant differences of the orientation behaviour and electrooptical responses of the nematic liquid crystal. The AFM and SEM samples were prepared by immersing the LC gels in hexane for two days to remove **5CB**. Microscope observation indicates that the morphologies of the hydrogen-bonded aggregates are maintained after the extraction of the liquid crystal due to the insolubility of the gelators for hexane.
